# Supplementary material
Source: Springer Nature journal article supplement (https://www.springermedizin.de/resource/supplementary/12958_2009_664_MOESM7_ESM.pdf/9568532)

*TNFRSF11A*

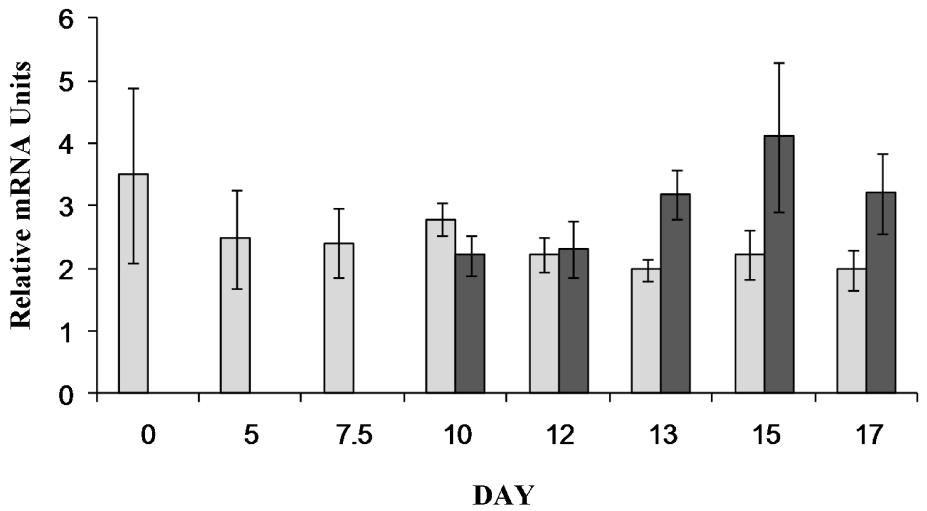

*TLR4*

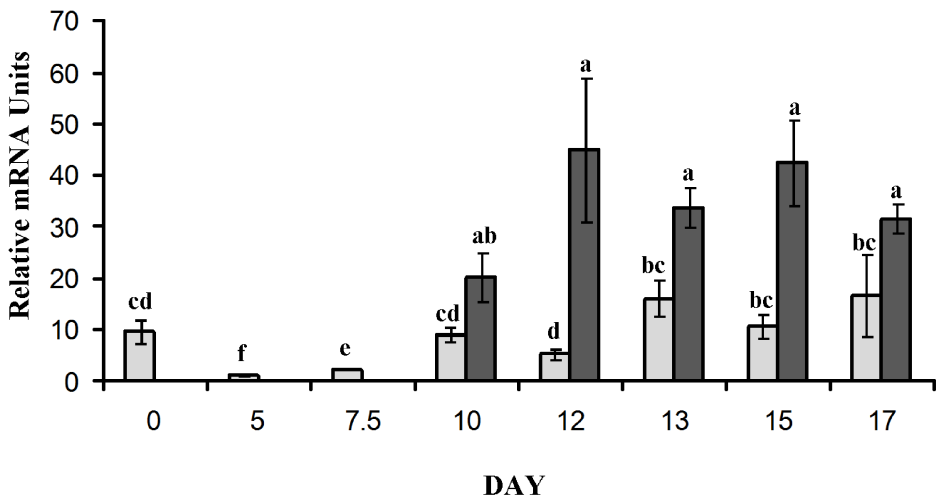

Supplement: MOESM7 [file 9568532]
